# Supplementary material for: Cost-Effective 3D Reconstruction of Retinal Vasculature from 2D OCTA B-Scans: A Software-Based Approach with Layer-Specific Insights
Source: Research Square preprint supplement (doi:10.21203/rs.3.rs-8672146/v1), 2026-02-09
Supplement: Supplementary file 1 [file 0efdb5debf9cfe2f6690f0c0.docx]

# Appendix

Table A1. Case-wise DICE, 2D, and 3D vessel density metrics for HCs and PTs across retinal layers. Metrics are reported for two conditions: Pre (pre-interpolation) and Post (post-interpolation). For 2D densities, the GT (Ground Truth; software-derived gold standard) values are also included.

| **Case** | **DR Severity (ETDRS Level)** | **Superficial** | | | | | | **Deep** | | | | | | **retina** | | | | | |
| --- | --- | --- | --- | --- | --- | --- | --- | --- | --- | --- | --- | --- | --- | --- | --- | --- | --- | --- | --- |
| **DICE**  **(%)** | **2D Density** | | | **3D Density** | | **DICE** | **2D Density** | | | **3D Density** | | **DICE** | **2D Density** | | | **3D Density** | |
| **GT** | **pre** | **post** | **pre** | **post** | **GT** | **pre** | **post** | **pre** | **post** | **GT** | **pre** | **post** | **pre** | **post** |
| **HC1** |  | **77.5** | 41.89 | 15.26 | **28.76** | 9.16 | **20.7** | **63.45** | 45.64 | 10.96 | **23.01** | 4.72 | **16.08** | **80.43** | 44.36 | 22.29 | **39.96** | 7.15 | **18.81** |
| **HC2** |  | **82.54** | 42.14 | 18.26 | **34.09** | 10.68 | **24.38** | **77.08** | 45.1 | 16.5 | **32.54** | 8.93 | **26.78** | **83.36** | 45.33 | 27.44 | **46.1** | 10.15 | **26.22** |
| **HC3** |  | **78.02** | 40.81 | 15.03 | **28.54** | 7.83 | **18.64** | **65.25** | 44.39 | 11.13 | **23.21** | 4.85 | **15.91** | **82.02** | 43.28 | 22.73 | **40.86** | 6.67 | **17.98** |
| **HC4** |  | **85.18** | 39.65 | 18.29 | **34** | 10.91 | **25.27** | **74.27** | 43.12 | 13.91 | **28.24** | 6.77 | **21.83** | **84.67** | 45.07 | 26.15 | **44.99** | 9.12 | **23.96** |
| **HC5** |  | **78.38** | 41.19 | 15.15 | **29.11** | 9.21 | **22.56** | **75.44** | 45.37 | 15.09 | **30.3** | 8.41 | **26.04** | **83.03** | 46.24 | 24.69 | **43.42** | 8.96 | **24.38** |
| **HC6** |  | **78.48** | 39.87 | 14.71 | **27.78** | 8.57 | **19.88** | **61.41** | 42.3 | 9.32 | **20.04** | 3.92 | **14.16** | **81.65** | 43.32 | 20.41 | **37.4** | 6.48 | **17.34** |
| **HC7** |  | **77.77** | 40.25 | 14.53 | **27.74** | 8.45 | **20.07** | **64.78** | 42.94 | 10.55 | **22.07** | 4.8 | **16.03** | **81.42** | 42.95 | 21.17 | **38.27** | 6.98 | **18.87** |
| **HC8** |  | **80.63** | 39.65 | 16.22 | **30.61** | 9.49 | **22.31** | **72.71** | 43.21 | 13.8 | **28.05** | 7.09 | **22.2** | **82.37** | 42.87 | 24.65 | **43.13** | 8.49 | **22.51** |
| **HC9** |  | **76.04** | 38.22 | 12.77 | **24.16** | 7.36 | **16.83** | **72.86** | 42.15 | 12.78 | **25.68** | 6.13 | **18.71** | **83.88** | 45.19 | 21.87 | **39.13** | 7.02 | **18.49** |
|  |  |  |  |  |  |  |  |  |  |  |  |  |  |  |  |  |  |  |  |
| **PT1** | Mild non-proliferative DR, (ETDRS level 20) | **83.03** | 33.51 | 14.27 | **27.07** | 7.25 | **16.34** | **70.3** | 35.99 | 10.31 | **21.23** | 5.17 | **15.9** | **84.38** | 39.15 | 21.25 | **38.7** | 6.62 | **16.9** |
| **PT2** | Moderate NPDR, (level 35) | **80.26** | 38.86 | 15.83 | **30.38** | 8.02 | **19.52** | **67.3** | 37.33 | 10.43 | **21.57** | 4.54 | **14.56** | **81.59** | 44.13 | 23.17 | **42.31** | 6.57 | **17.81** |
| **PT3** | Mild NPDR, (level 20) | **74.11** | 29.78 | 9.31 | **17.97** | 7.55 | **16.07** | **76.15** | 42.66 | 14.78 | **29.4** | 6.48 | **19.64** | **83.81** | 42.83 | 19.98 | **37.07** | 7.1 | **18.69** |
| **PT4** | Severe NPDR, (level 53) | **84.24** | 38.15 | 17.86 | **32.97** | 6.09 | **15.36** | **53.46** | 31.42 | 5.81 | **12.08** | 3.37 | **10.32** | **85.3** | 42.1 | 21.1 | **37.93** | 5.35 | **14.05** |
| **PT5** | Moderate NPDR, (level 43) | **82.96** | 39.31 | 16.16 | **30.35** | 8.9 | **20.68** | **69.46** | 41.2 | 11.14 | **23.16** | 5.75 | **19.19** | **85** | 46.04 | 24.04 | **42.63** | 7.9 | **21.06** |
| **PT6** | Mild NPDR, (level 20) | **78.65** | 41.17 | 14.9 | **28.38** | 8.35 | **19.92** | **66.57** | 43.35 | 10.85 | **22.69** | 5.25 | **17.59** | **83.53** | 45.58 | 22.31 | **40.66** | 7.1 | **19.4** |
| **PT7** | Moderate NPDR, (level 47) | **81.2** | 32.93 | 12.71 | **24.21** | 7.06 | **15.49** | **68.93** | 35.07 | 9.58 | **19.48** | 4.54 | **13.7** | **84.94** | 40.5 | 19.57 | **35.87** | 6.02 | **15.08** |

Table A2. Case-wise Dice (%) values for HCs and PTs across retinal layers. These values are reported based on the order of the spline interpolation, ranging from order 1 (linear interpolation) to quadratic (order 2), cubic (order 3), and higher orders (order 4 and order 5). These values are reported in %.

| **Case** | **Superficial** | | | | | **Deep** | | | | | **retina** | | | | |
| --- | --- | --- | --- | --- | --- | --- | --- | --- | --- | --- | --- | --- | --- | --- | --- |
| **Order 1**  **(Linear)** | **Order 2**  **(Quadratic spline)** | **Order 3**  **(Cubic Spline)** | **Order 4**  **(4th-order)** | **Order 5**  **(5th-order)** | **Order 1**  **(Linear)** | **Order 2**  **(Quadratic spline)** | **Order 3**  **(Cubic Spline)** | **Order 4**  **(4th-order)** | **Order 5**  **(5th-order)** | **Order 1**  **(Linear)** | **Order 2**  **(Quadratic spline)** | **Order 3**  **(Cubic Spline)** | **Order 4**  **(4th-order)** | **Order 5**  **(5th-order)** |
| **HC1** | 75.51 | 76.81 | 77.01 | 77.39 | **77.5** | 61.35 | 62.04 | 62.66 | 63.23 | **63.45** | 79.51 | 80.14 | 80.21 | 80.36 | **80.43** |
| **HC2** | 81.39 | 82.16 | 82.31 | 82.49 | **82.54** | 75.8 | 76.41 | 76.69 | 76.98 | **77.08** | 83.06 | 83.43 | 83.39 | 83.35 | **83.36** |
| **HC3** | 76.12 | 77.37 | 77.54 | 77.87 | **78.02** | 63.32 | 63.94 | 64.53 | 65.02 | **65.25** | 81.28 | 81.85 | 81.86 | 81.98 | **82.02** |
| **HC4** | 83.93 | 84.72 | 84.85 | 85.07 | **85.18** | 72.65 | 73.15 | 73.66 | 74.06 | **74.27** | 84.34 | 84.57 | 84.63 | 84.65 | **84.67** |
| **HC5** | 76.39 | 77.67 | 77.88 | 78.08 | **78.38** | 73.81 | 74.71 | 75.08 | 75.29 | **75.44** | 82.41 | 82.94 | 82.91 | 83.05 | 83.03 |
| **HC6** | 76.44 | 77.75 | 77.98 | 78.33 | **78.48** | 59.01 | 59.78 | 60.49 | 60.84 | **61.41** | 80.54 | 81.25 | 81.39 | 81.58 | **81.65** |
| **HC7** | 75.78 | 77.09 | 77.13 | 77.67 | **77.77** | 62.83 | 63.55 | 64.11 | 64.56 | **64.78** | 80.61 | 81.1 | 81.1 | 81.27 | **81.42** |
| **HC8** | 79.14 | 80.11 | 80.24 | 80.53 | **80.63** | 70.92 | 71.71 | 72.14 | 72.54 | **72.71** | 81.96 | 82.29 | 82.33 | 82.36 | **82.37** |
| **HC9** | 73.98 | 75.34 | 75.56 | 75.92 | **76.04** | 71.02 | 71.84 | 72.23 | 72.65 | **72.86** | 82.84 | 83.73 | 83.65 | 83.84 | **83.88** |
|  |  |  |  |  |  |  |  |  |  |  |  |  |  |  |  |
| **PT1** | 81.87 | 82.72 | 82.8 | 82.96 | **83.03** | 68.4 | 69.25 | 69.72 | 70.1 | **70.3** | 83.98 | 84.29 | 84.33 | 84.4 | 84.38 |
| **PT2** | 79.3 | 79.91 | 80 | 80.21 | **80.26** | 65.69 | 66.29 | 66.75 | 67.12 | **67.3** | 81.19 | 81.5 | 81.55 | 81.53 | **81.59** |
| **PT3** | 72.32 | 73.39 | 73.44 | 73.99 | **74.11** | 75 | 75.65 | 75.89 | 76.02 | **76.15** | 82.79 | 83.5 | 83.59 | 83.65 | **83.81** |
| **PT4** | 83.31 | 84.02 | 83.94 | 84.21 | **84.24** | 51.45 | 52.13 | 52.69 | 53.1 | **53.46** | 84.64 | 85.12 | 85.17 | 85.25 | **85.3** |
| **PT5** | 81.51 | 82.46 | 82.65 | 82.88 | **82.96** | 67.47 | 68.19 | 68.67 | 69.18 | **69.46** | 84.37 | 84.87 | 84.96 | 84.95 | **85** |
| **PT6** | 76.85 | 78 | 78.17 | 78.53 | **78.65** | 64.48 | 65.19 | 65.82 | 66.34 | **66.57** | 82.46 | 83.34 | 83.31 | 83.49 | **83.53** |
| **PT7** | 79.55 | 80.63 | 80.68 | 80.95 | **81.2** | 66.92 | 67.72 | 68.13 | 68.54 | **68.93** | 84.02 | 84.71 | 84.77 | 84.8 | **84.94** |

Table A3. Average Dice scores and processing times for interpolation across retinal layers in Healthy (HC) and Pathologic (PT) groups, for interpolation orders ranging from 1 to 5.

| Layer | Method | Time (s) | Dice Score  (Mean ± SD) | 3D Vessel Density (Mean ± SD) |
| --- | --- | --- | --- | --- |
| Superficial | Linear interpolation  (order 1) | 2.51 | 0.7833 ± 0.0341 | 0.1133 ± 0.0190 |
| Quadratic Spline interpolation  (order 2) | 7.52 | 0.7938 ± 0.0322 | 0.1558 ± 0.0260 |
| Cubic Spline interpolation  (order 3) | 13.71 | 0.7951 ± 0.0320 | 0.1684 ± 0.0277 |
| Quartic Spline interpolation  (order 4) | 25.34 | 0.7981 ± 0.0311 | 0.1876 ± 0.0295 |
| Quintic Spline interpolation  (order 5) | **44.10** | **0.7993 ± 0.0309** | **0.1962 ± 0.0306** |
| Deep | Linear interpolation  (order 1) | 2.38 | 0.6688 ± 0.0647 | 0.0867 ± 0.0242 |
| Quadratic Spline interpolation  (order 2) | 7.26 | 0.6759 ± 0.0648 | 0.1325 ± 0.0354 |
| Cubic Spline interpolation  (order 3) | 13.83 | 0.6807 ± 0.0638 | 0.1477 ± 0.0387 |
| Quartic Spline interpolation  (order 4) | 25.81 | 0.6847 ± 0.0632 | 0.1686 ± 0.0426 |
| Quintic Spline interpolation  (order 5) | **44.18** | **0.6871 ± 0.0624** | **0.1803 ± 0.0446** |
| Retina | Linear interpolation  (order 1) | 2.68 | 0.8250 ± 0.0155 | 0.1048 ± 0.0194 |
| Quadratic Spline interpolation  (order 2) | 8.56 | 0.8303 ± 0.0152 | 0.1500 ± 0.0276 |
| Cubic Spline interpolation  (order 3) | 16.10 | 0.8307 ± 0.0152 | 0.1641 ± 0.0298 |
| Quartic Spline interpolation  (order 4) | 29.43 | 0.8315 ± 0.0149 | 0.1845 ± 0.0322 |
| Quintic Spline interpolation  (order 5) | **45.83** | **0.8321 ± 0.0148** | **0.1947 ± 0.0335** |
